# Supplementary material for: Functional Mapping of Protein-Protein Interactions in an Enzyme Complex by Directed Evolution
Source: PubMed Central journal article supplement (PMC4281200; doi:10.1371/journal.pone.0116234), 2014-12-31
Supplement: pone.0116234.s003.pdf [file pone.0116234.s003.pdf]

# Functional Mapping of Protein-Protein Interactions in an Enzyme Complex by Directed Evolution

Kathrin Roderer, Martin Neuenschwander, Giosiana Codoni, Severin Sasso, Marianne Gamper and Peter Kast\*

## Supporting Table S1 Compilation of amino acids observed in MtCM variants before and after selection (Fig. 5A-C tabular version)

### (A) Amino acid residues found under non-selective conditions (M9c +FY)

| Wt<br>Residue | Position G84 |                         | Position R85 |                         | Position G86 |                         | Position R87 |                         | Position L88 |                         | Position G89 |                         | Position H90 |                         |
|---------------|--------------|-------------------------|--------------|-------------------------|--------------|-------------------------|--------------|-------------------------|--------------|-------------------------|--------------|-------------------------|--------------|-------------------------|
|               | in %         | found /<br>library size | in %         | found /<br>library size | in %         | found /<br>library size | in %         | found /<br>library size | in %         | found /<br>library size | in %         | found /<br>library size | in %         | found /<br>library size |
| G             |              |                         | 5            | 2/41                    | 6            | 2/35                    | 5            | 2/39                    |              |                         | 18           | 6/34                    | 9            | 3/34                    |
| A             | 19           | 6/32                    |              |                         | 3            | 1/35                    | 8            | 3/39                    | 3            | 1/31                    | 6            | 2/34                    | 9            | 3/34                    |
| S             | 13           | 4/32                    | 5            | 2/41                    | 9            | 3/35                    | 10           | 4/39                    | 10           | 3/31                    | 15           | 5/34                    | 12           | 4/34                    |
| C             | 6            | 2/32                    | 5            | 2/41                    |              |                         | 3            | 1/39                    | 3            | 1/31                    |              |                         | 3            | 1/34                    |
| T             |              |                         | 15           | 6/41                    | 6            | 2/35                    | 5            | 2/39                    | 13           | 4/31                    | 9            | 3/34                    | 3            | 1/34                    |
| D             | 6            | 2/32                    | 12           | 5/41                    | 6            | 2/35                    | 5            | 2/39                    | 6            | 2/31                    | 9            | 3/34                    |              |                         |
| P             | 6            | 2/32                    | 2            | 1/41                    | 11           | 4/35                    | 5            | 2/39                    | 6            | 2/31                    |              |                         | 3            | 1/34                    |
| N             |              |                         | 7            | 3/41                    | 6            | 2/35                    |              |                         |              |                         |              |                         |              |                         |
| V             |              |                         | 5            | 2/41                    | 9            | 3/35                    | 10           | 4/39                    | 6            | 2/31                    | 6            | 2/34                    | 3            | 1/34                    |
| E             |              |                         |              |                         | 3            | 1/35                    | 5            | 2/39                    |              |                         | 3            | 1/34                    | 3            | 1/34                    |
| Q             |              |                         | 2            | 1/41                    |              |                         | 10           | 4/39                    | 6            | 2/31                    | 3            | 1/34                    |              |                         |
| H             | 3            | 1/32                    | 2            | 1/41                    | 6            | 2/35                    | 3            | 1/39                    |              |                         |              |                         | 15           | 5/34                    |
| L             | 13           | 4/32                    | 10           | 4/41                    | 3            | 1/35                    | 8            | 3/39                    | 6            | 2/31                    | 9            | 3/34                    | 6            | 2/34                    |
| I             | 6            | 2/32                    | 7            | 3/41                    | 14           | 5/35                    | 3            | 1/39                    | 10           | 3/31                    | 9            | 3/34                    | 12           | 4/34                    |
| M             |              |                         |              |                         | 3            | 1/35                    | 3            | 1/39                    | 10           | 3/31                    |              |                         | 3            | 1/34                    |
| K             |              |                         | 2            | 1/41                    | 6            | 2/35                    |              |                         |              |                         | 3            | 1/34                    |              |                         |
| R             | 13           | 4/32                    | 7            | 3/41                    |              |                         | 5            | 2/39                    | 6            | 2/31                    | 3            | 1/34                    | 15           | 5/34                    |
| F             | 3            | 1/32                    | 7            | 3/41                    | 6            | 2/35                    | 5            | 2/39                    | 3            | 1/31                    | 3            | 1/34                    | 3            | 1/34                    |
| Y             | 6            | 2/32                    |              |                         | 3            | 1/35                    | 5            | 2/39                    | 3            | 1/31                    | 3            | 1/34                    |              |                         |
| W             |              |                         | 2            | 1/41                    |              |                         |              |                         |              |                         |              |                         |              |                         |
| *             | 6            | 2/32                    | 2            | 1/41                    | 3            | 1/35                    | 3            | 1/39                    | 6            | 2/31                    | 3            | 1/34                    | 3            | 1/34                    |

**(B) Preferred residues selected under a stringent regime (M9c, no inducer present) in the presence of MtDS (pKIMP-ACG)**

| Wt<br>Residue | <u>Position G84</u> |                         | <u>Position R85</u> |                         | <u>Position G86</u> |                         | <u>Position R87</u> |                         | <u>Position L88</u> |                         | <u>Position G89</u> |                         | <u>Position H90</u> |                         |
|---------------|---------------------|-------------------------|---------------------|-------------------------|---------------------|-------------------------|---------------------|-------------------------|---------------------|-------------------------|---------------------|-------------------------|---------------------|-------------------------|
|               | in %                | found /<br>library size | in %                | found /<br>library size | in %                | found /<br>library size | in %                | found /<br>library size | in %                | found /<br>library size | in %                | found /<br>library size | in %                | found /<br>library size |
| G             | 73                  | 33/45                   |                     |                         | 100                 | 64/64                   | 1                   | 1/89                    |                     |                         | 51                  | 40/78                   | 23                  | 13/57                   |
| A             | 18                  | 8/45                    |                     |                         |                     |                         | 10                  | 9/89                    |                     |                         | 3                   | 2/78                    | 4                   | 2/57                    |
| S             | 4                   | 2/45                    |                     |                         |                     |                         | 12                  | 11/89                   | 3                   | 2/66                    | 10                  | 8/78                    | 7                   | 4/57                    |
| C             |                     |                         |                     |                         |                     |                         |                     |                         | 2                   | 1/66                    |                     |                         | 2                   | 1/57                    |
| T             | 4                   | 2/45                    |                     |                         |                     |                         | 8                   | 7/89                    | 2                   | 1/66                    |                     |                         | 11                  | 6/57                    |
| D             |                     |                         |                     |                         |                     |                         |                     |                         |                     |                         |                     |                         |                     |                         |
| P             |                     |                         |                     |                         |                     |                         | 7                   | 6/89                    | 11                  | 7/66                    |                     |                         | 2                   | 1/57                    |
| N             |                     |                         |                     |                         |                     |                         | 8                   | 7/89                    |                     |                         | 1                   | 1/78                    |                     |                         |
| V             |                     |                         |                     |                         |                     |                         | 4                   | 4/89                    | 5                   | 3/66                    | 3                   | 2/78                    | 4                   | 2/57                    |
| E             |                     |                         |                     |                         |                     |                         | 1                   | 1/89                    |                     |                         |                     |                         | 2                   | 1/57                    |
| Q             |                     |                         |                     |                         |                     |                         | 3                   | 3/89                    |                     |                         |                     |                         | 5                   | 3/57                    |
| H             |                     |                         |                     |                         |                     |                         | 4                   | 4/89                    |                     |                         |                     |                         | 2                   | 1/57                    |
| L             |                     |                         |                     |                         |                     |                         | 10                  | 9/89                    | 62                  | 41/66                   |                     |                         | 2                   | 1/57                    |
| I             |                     |                         |                     |                         |                     |                         | 1                   | 1/89                    | 8                   | 5/66                    |                     |                         | 2                   | 1/57                    |
| M             |                     |                         |                     |                         |                     |                         |                     |                         | 9                   | 6/66                    |                     |                         |                     |                         |
| K             |                     |                         |                     |                         |                     |                         | 9                   | 8/89                    |                     |                         |                     |                         | 2                   | 1/57                    |
| R             |                     |                         | 100                 | 83/83                   |                     |                         | 19                  | 17/89                   |                     |                         | 6                   | 5/78                    | 21                  | 12/57                   |
| F             |                     |                         |                     |                         |                     |                         |                     |                         |                     |                         |                     |                         | 11                  | 6/57                    |
| Y             |                     |                         |                     |                         |                     |                         |                     |                         |                     |                         |                     |                         |                     |                         |
| W             |                     |                         |                     |                         |                     |                         | 1                   | 1/89                    |                     |                         |                     |                         | 2                   | 1/57                    |
| *             |                     |                         |                     |                         |                     |                         |                     |                         |                     |                         | 26                  | 20/78                   | 2                   | 1/57                    |

**(C) Residue patterns emerging in selected MtCM variants grown in the absence of MtDS (pKIMP-UAUC)**

| Wt | Position G84 |       | Position R85            |       | Position G86            |       | Position R87            |      | Position L88            |      | Position G89            |       | Position H90            |      |
|----|--------------|-------|-------------------------|-------|-------------------------|-------|-------------------------|------|-------------------------|------|-------------------------|-------|-------------------------|------|
|    | Residue      | in %  | found /<br>library size | in %  | found /<br>library size | in %  | found /<br>library size | in % | found /<br>library size | in % | found /<br>library size | in %  | found /<br>library size | in % |
| G  | 17           | 11/63 |                         |       | 70                      | 44/63 | 2                       | 1/62 | 8                       | 5/65 | 3                       | 2/63  | 12                      | 7/60 |
| A  |              |       | 2                       | 1/63  |                         |       | 8                       | 5/62 | 5                       | 3/65 | 5                       | 3/63  | 5                       | 3/60 |
| S  | 43           | 27/63 |                         |       | 3                       | 2/63  | 11                      | 7/62 | 14                      | 9/65 | 5                       | 3/63  | 5                       | 3/60 |
| C  | 35           | 22/63 | 3                       | 2/63  |                         |       | 3                       | 2/62 | 5                       | 3/65 | 3                       | 2/63  |                         |      |
| T  |              |       | 10                      | 6/63  | 6                       | 4/63  | 6                       | 4/62 | 8                       | 5/65 | 5                       | 3/63  | 12                      | 7/60 |
| D  |              |       |                         |       |                         |       | 8                       | 5/62 |                         |      | 3                       | 2/63  | 7                       | 4/60 |
| P  |              |       |                         |       |                         |       | 15                      | 9/62 | 3                       | 2/65 | 21                      | 13/63 | 8                       | 5/60 |
| N  |              |       |                         |       |                         |       |                         |      | 5                       | 3/65 | 3                       | 2/63  | 3                       | 2/60 |
| V  |              |       | 2                       | 1/63  | 2                       | 1/63  | 3                       | 2/62 | 12                      | 8/65 | 2                       | 1/63  | 7                       | 4/60 |
| E  |              |       |                         |       |                         |       | 10                      | 6/62 | 2                       | 1/65 | 5                       | 3/63  |                         |      |
| Q  |              |       | 3                       | 2/63  |                         |       | 3                       | 2/62 | 5                       | 3/65 | 3                       | 2/63  | 2                       | 1/60 |
| H  |              |       |                         |       |                         |       | 2                       | 1/62 | 8                       | 5/65 | 3                       | 2/63  | 2                       | 1/60 |
| L  |              |       |                         |       | 5                       | 3/63  | 6                       | 4/62 | 11                      | 7/65 | 8                       | 5/63  | 10                      | 6/60 |
| I  |              |       |                         |       |                         |       | 5                       | 3/62 | 3                       | 2/65 | 5                       | 3/63  |                         |      |
| M  | 3            | 2/63  |                         |       |                         |       |                         |      |                         |      | 2                       | 1/63  |                         |      |
| K  |              |       | 3                       | 2/63  | 2                       | 1/63  | 3                       | 2/62 | 5                       | 3/65 | 5                       | 3/63  | 3                       | 2/60 |
| R  |              |       | 76                      | 48/63 | 10                      | 6/63  | 11                      | 7/62 | 6                       | 4/65 | 6                       | 4/63  | 3                       | 2/60 |
| F  | 2            | 1/63  |                         |       |                         |       |                         |      |                         |      | 5                       | 3/63  | 2                       | 1/60 |
| Y  |              |       | 2                       | 1/63  |                         |       |                         |      |                         |      | 5                       | 3/63  | 3                       | 2/60 |
| W  |              |       |                         |       |                         |       |                         |      |                         |      |                         |       | 7                       | 4/60 |
| *  |              |       |                         |       | 3                       | 2/63  | 3                       | 2/62 | 3                       | 2/65 | 5                       | 3/63  | 10                      | 6/60 |
